# Supplementary material for: A hierarchically porous carbon stabilized atomically dispersed Au catalyst for acetylene hydrochlorination
Source: Royal Society of Chemistry journal article supplement (doi:10.1039/d4qi00756e), 2024-01-01
Supplement: d4qi00756e1.pdf [file d4qi00756e1.pdf]

## Supporting information

### **Hierarchical porous carbon stabilized atomically dispersed Au catalyst for acetylene hydrochlorination**

Guojun Lan, Jinlong Zhou, Qingfeng Ye, Di Lin, Yiyang Qiu, Zaizhe Cheng, Xiucheng Sun, Ying Li\*

Institute of Industrial Catalysis, State Key Laboratory Breeding Base of Green Chemistry Synthesis Technology,

Zhejiang University of Technology, \*Corresponding authors E-mail address: [liying@zjut.edu.cn](mailto:liying@zjut.edu.cn) (Y. Li)

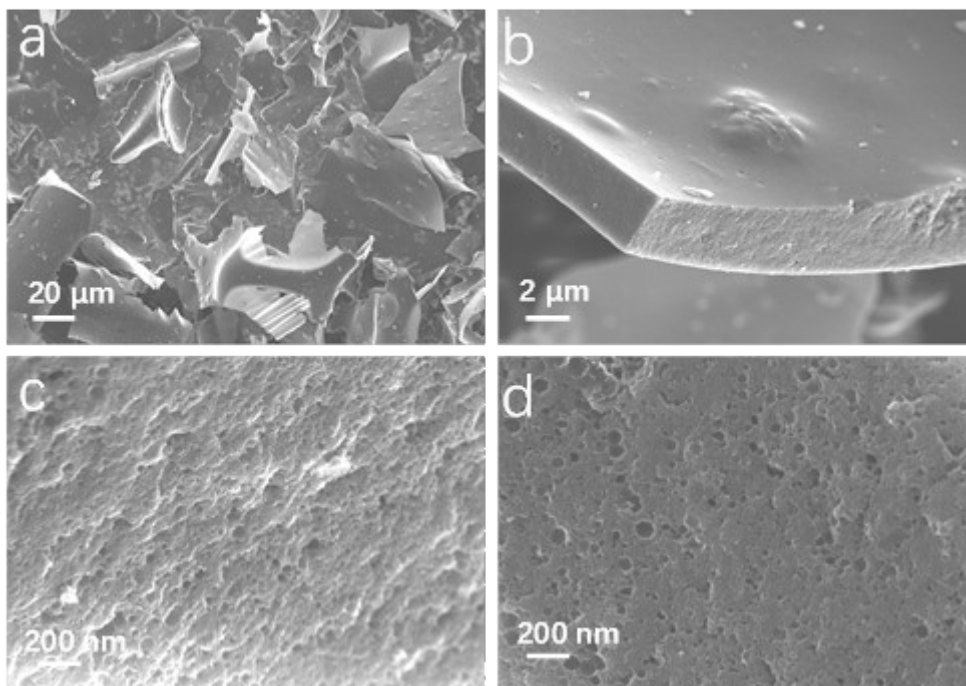

**Figure S1** SEM images of Au-CSC-850 catalyst.

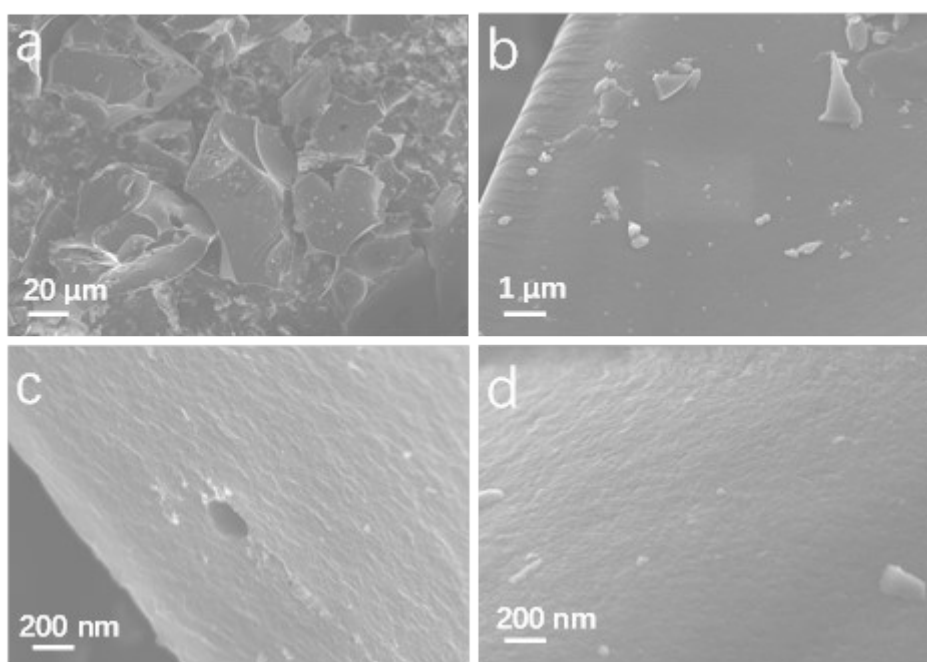

**Figure S2** SEM images of Au-SC-850 catalyst.

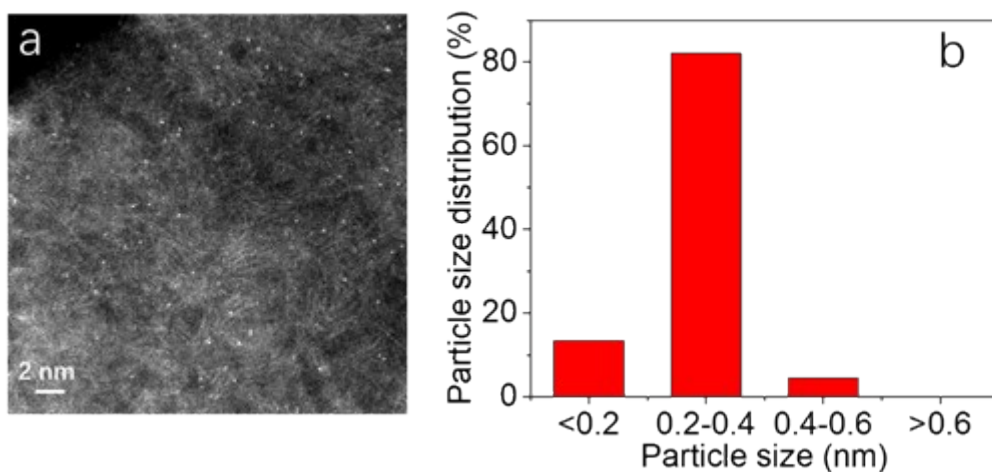

**Figure S3** (a) The representative aberration-corrected high-angle annular dark field-scanning transmission electron microscopy images of Au-CSC-850 catalyst, and (b) histogram of Au particle size distribution over Au-CSC-850 catalyst.

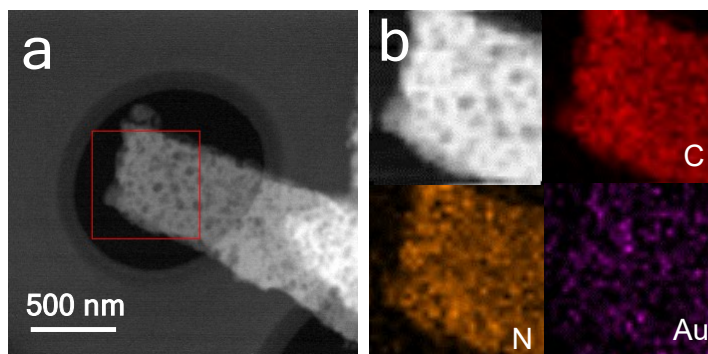

**Figure S4.** STEM image (a) and EDX elemental mapping (b) of Au-CSC-850 catalyst.

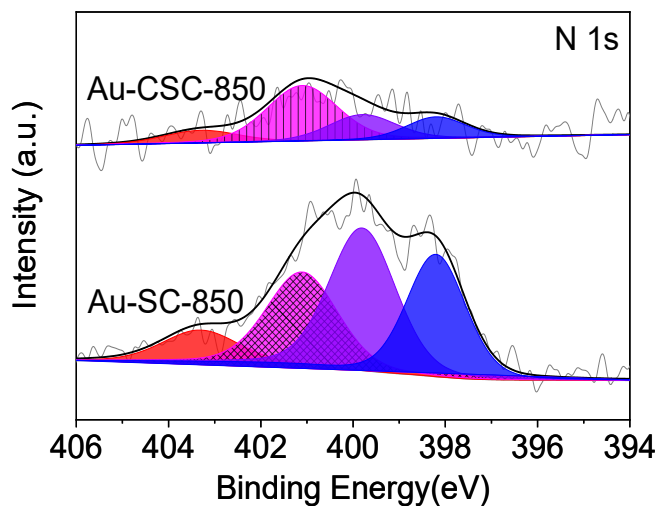

**Figure S5** Deconvolution of N 1s XPS spectra for Au-CSC-850 and Au-SC-850 catalysts.

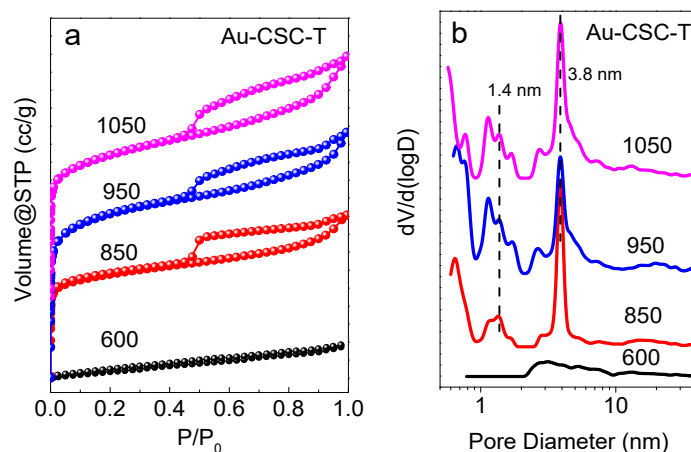

**Figure S6**  $N_2$  adsorption isotherms (a) and pore size distribution (b) of Au-CSC-T catalysts

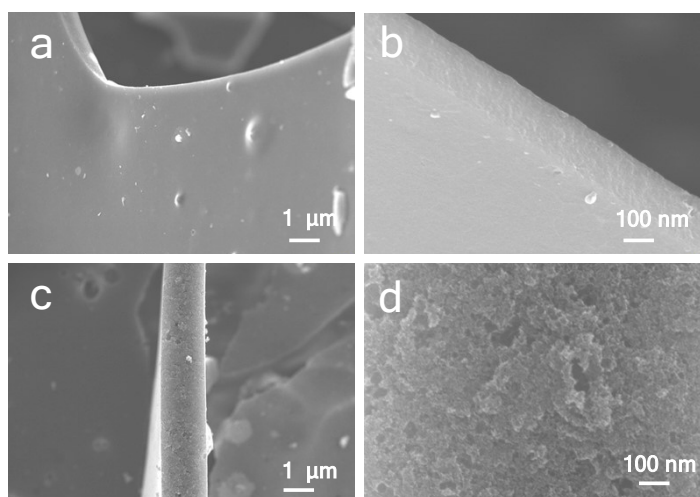

**Figure S7** SEM images of (a, b) Au-CSC-600 and (c, d) Au-CSC-1050 catalysts.

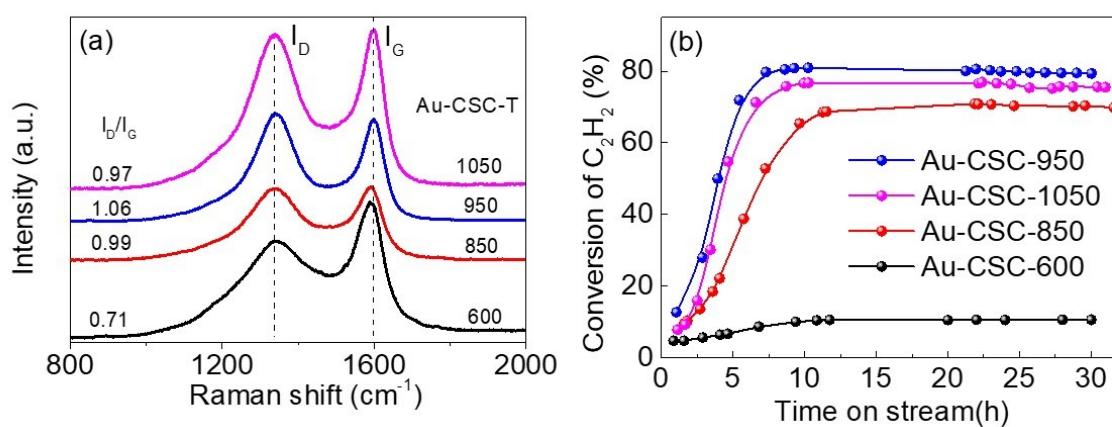

**Figure S8** Raman spectra (a) and conversion of acetylene (b) for Au-CSC-T catalysts in acetylene hydrochlorination. Temperature: 180 °C;  $V_{C_2H_2}:V_{HCl} = 1.10$ ; GHSV of  $C_2H_2 = 600 \text{ h}^{-1}$ .

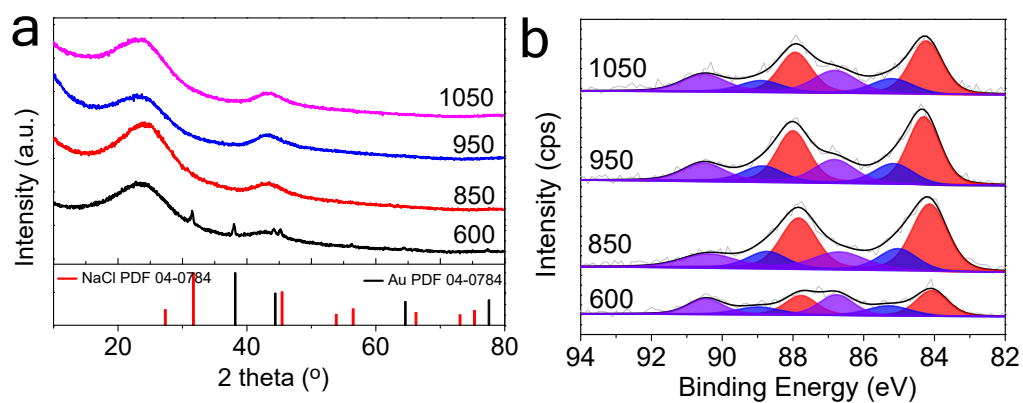

**Figure S9** (a) XRD patterns and (b) deconvolution of Au 4f XPS spectra for Au-CSC-T catalysts.

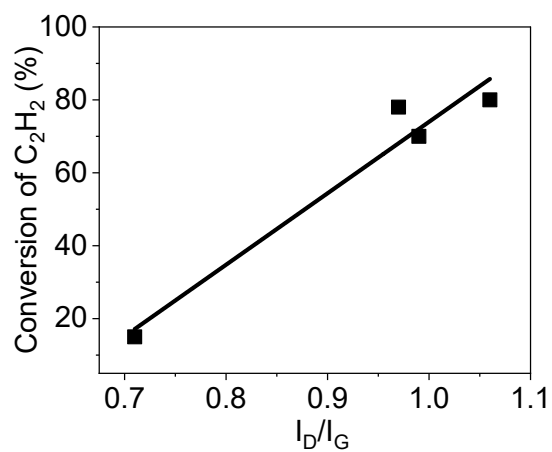

**Figure S10** The relationship between the conversion of acetylene and defects (ratio of  $I_D/I_G$ ) for Au-CSC-T catalysts in acetylene hydrochlorination.

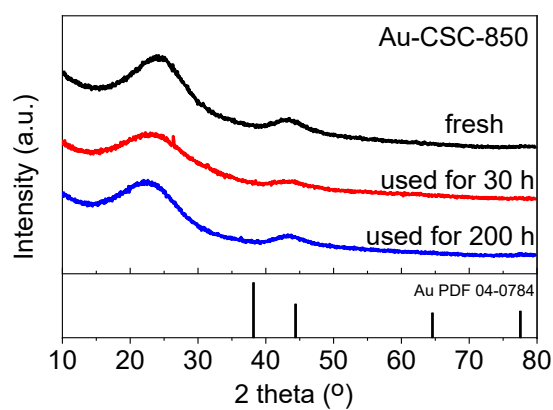

**Figure S11** XRD patterns of used Au-CSC-850 catalyst.

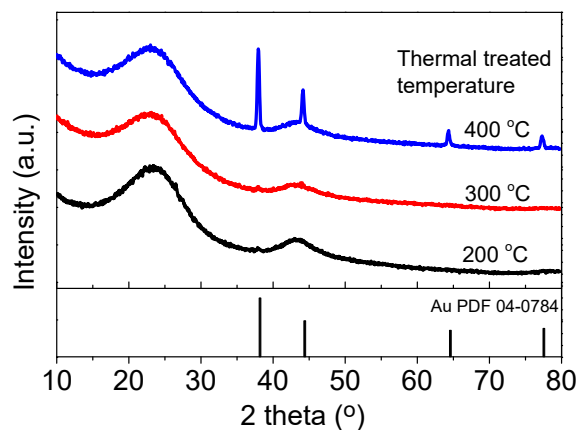

**Figure S12** XRD patterns of Au-CSC-850 catalyst thermal treated at elevated temperature.

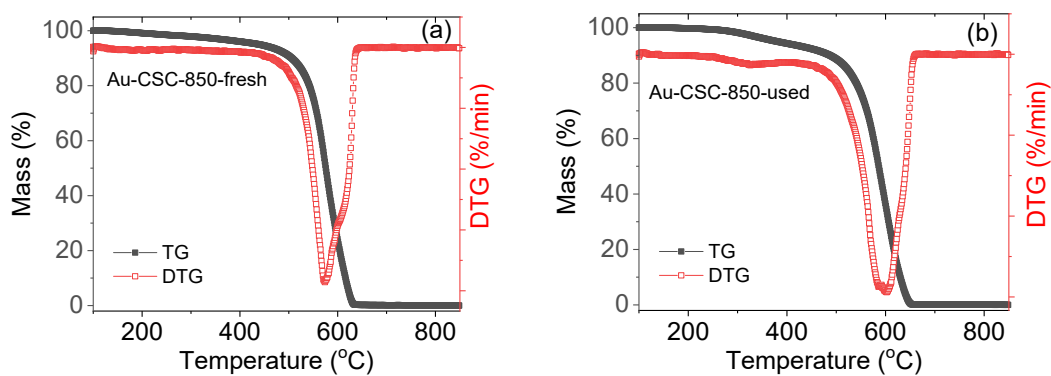

**Figure S13** TG and DTG curves of (a) fresh and (b) used Au-CSC-850 catalysts under air flow.

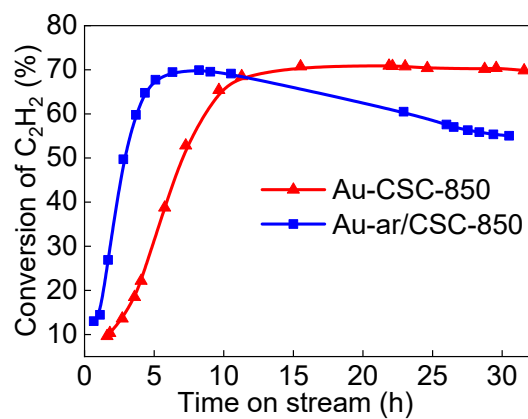

**Figure S14** Catalytic performance for Au-CSC-850 and Au/CSC-850 catalysts  
 Reaction condition:  $T = 180\text{ }^{\circ}\text{C}$ ,  $P = 0.1\text{ MPa}$ ,  $\text{GHSV}(\text{C}_2\text{H}_2) = 600\text{ h}^{-1}$ ,  $V_{(\text{HCl})}/V_{(\text{C}_2\text{H}_2)} = 1.1$

**Table S1.** The comparison of catalyst performance for various Au/C Catalysts in acetylene hydrochlorination.

| Catalysts   | Notes/precursors                                                                | Au (wt%) | Temp. (°C) | C <sub>2</sub> H <sub>2</sub> GHSV (h <sup>-1</sup> ) | C <sub>2</sub> H <sub>2</sub> Conversion (%) | VCM Productivity (mol kg <sub>cat</sub> <sup>-1</sup> h <sup>-1</sup> ) | References |
|-------------|---------------------------------------------------------------------------------|----------|------------|-------------------------------------------------------|----------------------------------------------|-------------------------------------------------------------------------|------------|
| Au-CSC-850  | HAuCl <sub>4</sub> /H <sub>2</sub> O                                            | 0.31     | 180        | 600                                                   | 70.6                                         | ~169.6                                                                  | This work  |
| Au-CSC-950  | HAuCl <sub>4</sub> /H <sub>2</sub> O                                            | 0.55     | 180        | 600                                                   | 80.6                                         | ~193.6                                                                  | This work  |
| Au-CSC-1050 | HAuCl <sub>4</sub> /H <sub>2</sub> O                                            | 0.34     | 180        | 600                                                   | 76.8                                         | ~184.5                                                                  | This work  |
| Au/AC-D     | HAuCl <sub>4</sub> /H <sub>2</sub> O                                            | 0.25     | 180        | 1000                                                  | 55                                           | ~55.8                                                                   | Ref [1]    |
| Au/AC-D     | HAuCl <sub>4</sub> /H <sub>2</sub> O                                            | 0.5      | 180        | 1000                                                  | 72                                           | ~73.1                                                                   | Ref [1]    |
| Au/AC       | (NH <sub>4</sub> ) <sub>3</sub> Au(S <sub>2</sub> O <sub>3</sub> ) <sub>2</sub> | 0.3      | 180        | 227                                                   | ~97                                          | ~24.7                                                                   | Ref [2]    |
| Au/AC       | HAuCl <sub>4</sub> /Aqua regia                                                  | 0.5      | 180        | 227                                                   | ~95                                          | ~106.0                                                                  | Ref [2]    |
| Au-Cu/AC    | SCN: Au = 20:1/Aqua regia                                                       | 0.25     | 180        | 1200                                                  | ~60                                          | ~73.0                                                                   | Ref [3]    |
| Au-Cu/AC    | SCN: Au = 20:1/Aqua regia                                                       | 0.5      | 180        | 1200                                                  | ~70                                          | ~85.2                                                                   | Ref [3]    |
| Au/AC       | HAuCl <sub>4</sub> /H <sub>2</sub> O                                            | 1.0      | 200        | 650                                                   | ~75                                          | ~56.9                                                                   | Ref [4]    |

**Table S2** The XPS spectra fitting results of N 1s for Au-SC-850 and Au-CSC-T catalysts.

| Catalysts   | N content (%) | Relative content of different N species /% |                        |                       |                        |
|-------------|---------------|--------------------------------------------|------------------------|-----------------------|------------------------|
|             |               | Oxidized N (403.3 eV)                      | Graphitic N (401.0 eV) | Pyrrolic N (399.8 eV) | Pyridinic N (398.2 eV) |
| Au-SC-850   | 2.3           | 9.20                                       | 25.63                  | 37.05                 | 28.12                  |
| Au-CSC-600  | 1.4           | 11.98                                      | 25.45                  | 50.05                 | 12.53                  |
| Au-CSC-850  | 0.7           | 12.04                                      | 50.13                  | 21.56                 | 16.28                  |
| Au-CSC-950  | 0.7           | 20.99                                      | 33.42                  | 34.89                 | 10.70                  |
| Au-CSC-1050 | 0.9           | 7.55                                       | 41.70                  | 33.87                 | 16.88                  |

## References

- [1] Lan, G.J.; Ye, Q.F.; Zhu, Y.H.; Tang, H.D.; Han, W.F.; Li, Y., Single-Site Au/Carbon Catalysts with Single-Atom and Au Nanoparticles for Acetylene Hydrochlorination. *ACS Appl. Nano Mater.* 2020, 3(3), 3004-3010.
- [2] Johnston, P., Carthey, N., and Hutchings, G.J. Discovery, Development, and Commercialization of Gold Catalysts for Acetylene Hydrochlorination. *J. Am. Chem. Soc.* **2015**, 137, 14548-14557.
- [3] Zhou, K., Jia, J., Li, C., Xu, H., Zhou, J., Luo, G., and Wei, F., A low content Au-based catalyst for

hydrochlorination of  $C_2H_2$  and its industrial scale-up for future PVC processes. *Green Chem.* **2015**, 17, 356-364.

- [4] Kaiser S. K., Fako E., Manzocchi G., et al. Nanostructuring unlocks high performance of platinum single-atom catalysts for stable vinyl chloride production. *Nat. Catal.*, **2020**, 3(4): 376-385.
